# Supplementary material for: Parent and Service Provider Perspectives of a Digital Developmental Surveillance and Service Navigation Program in Rural Australia: A Qualitative Study
Source: Research Square preprint supplement (doi:10.21203/rs.3.rs-6373635/v1), 2025-05-09
Supplement: Supplementary file 1 [file 3b6096d92affdc14cb4ea342.docx]

**Appendix 2.** Standards for Reporting Qualitative Research Checklist

| **Index** | **Topic** | **Section(s)** | **Page No. in the main manuscript file** |
| --- | --- | --- | --- |
|  | Title and Abstract |  |  |
| 1 | Title | Title Page | 1-3 |
| 2 | Abstract | Abstract | 4-5 |
|  | Introduction |  |  |
| 3 | Problem formulation | Background | 5-7 |
| 4 | Purpose or research question | Background – Research Aim | 7-8 |
|  | Methods |  |  |
| 5 | Qualitative approach and research paradigm | Methods | 8-13 |
| 6 | Researcher characteristics and reflexivity | Methods – Data Analysis | 12-13 |
| 7 | Context | Methods – Study Context | 8-9 |
| 8 | Sampling strategy | Methods – Sampling and recruitment | 10-11 |
| 9 | Ethical issues pertaining to human subjects | Methods – Study procedure | 12 |
| 10 | Data collection methods | Methods – Study procedure | 12 |
| 11 | Data collection instruments and technologies | Methods – Study procedure | 12 |
| 12 | Units of study | Methods – Sampling and recruitment | 10-11 |
| 13 | Data processing | Methods – Data Analysis | 12-13 |
| 14 | Data analysis | Methods – Data Analysis | 12-13 |
| 15 | Techniques to enhance trustworthiness | Methods – Data Analysis | 12-13 |
|  | Results |  |  |
| 16 | Synthesis and interpretation | Results | 13-23 |
| 17 | Links to empirical data | Results | 13-23 |
|  | Discussion |  |  |
| 18 | Integration with prior work, implications, transferability, and contribution(s) to the field | Discussion | 23-30 |
| 19 | Limitations | Discussion – Strengths and Limitations | 29-30 |
| 20 | Conclusion | Conclusion | 30 |
|  | Other |  |  |
| 21 | Conflicts of interest | Competing Interests | 31 |
| 22 | Funding | Funding | 31 |

**Reference:** O’Brien BC, Harris IB, Beckman TJ, *et al.* Standards for reporting qualitative research: a synthesis of recommendations. *Acad Med.* 2014;89:1245–51.
